# Supplementary material
Source: PubMed Central journal article supplement (PMC2761345)
Supplement: 0908200106_0908200106SI.pdf [file 0908200106_0908200106SI.pdf]

# Supporting Information

Wu et al. 10.1073/pnas.0908200106

## SI Materials and Methods

**GnRH-GFP, vGluT2-GFP, and GAD67-GFP Mice.** Electrophysiological recordings were performed on GnRH, vGluT2, and GABAergic neurons in brain slices prepared from well-established lines of GnRH-GFP (kindly provided by Sue Moenter, University of Virginia) (1), vGluT2-GFP mice (2–5), and GAD67-GFP transgenic mice (kindly provided by K. Obata and Y. Yanagawa) (6, 7). MSDB cholinergic neurons were identified in murine brain slices in the living state, using the well-established fluorescent marker Cy3-labeled anti-NGFr (3–5  $\mu$ l; 0.4 mg/ml), which was stereotaxically injected bilaterally into the lateral ventricle of anesthetized mice with a Hamilton syringe (22-gauge needle) at a rate of 0.5  $\mu$ l/min (5, 8–10). Two to 5 days later, slices were prepared from fluorescently labeled mice for electrophysiological recordings. All experiments were carried out according to guidelines laid down by Yale University's animal welfare committee.

**Slice Preparation and Electrophysiological Recordings.** Male and female mice (2–23 weeks old) were anesthetized with chloral hydrate (400 mg/kg i.p.) and killed by decapitation. The ACSF (pH 7.35–7.38), equilibrated with 95%O<sub>2</sub>-5% CO<sub>2</sub>, contained the following (in mM): NaCl, 128; KCl, 3; NaH<sub>2</sub>PO<sub>4</sub>, 1.25; D-glucose, 10; NaHCO<sub>3</sub>, 26; CaCl<sub>2</sub>, 2 and MgCl<sub>2</sub>, 2. After decapitation, brains were removed, placed in a Petri dish containing ACSF, and trimmed to yield a small block containing the MSDB. Coronal slices 300  $\mu$ m in thickness were obtained with a Vibratome 1500 (Vibratome, St. Louis, MO) and transferred to a Plexiglas recording chamber (1.5 ml volume) on the fixed stage of an Olympus BX50WI scope for visualized whole-cell recording. The chamber was continuously perfused with normal ACSF at a rate of 2–3 ml/min and its temperature maintained at 33  $\pm$  0.5  $^{\circ}$ C. One to 2 hours later the slice was used for recording. The effect of MCH was mostly tested in one cell per mouse with

a maximum of three cells per mouse. The n values refer to the number of cells recorded; if more than one cell was recorded from a mouse in any experimental group, it is stated in Results.

Whole-cell current and voltage-clamp recordings were performed using previously described methods (11). The low-resistance (2.5–3.5 M $\Omega$ ) patch pipettes were filled with a solution containing the following (in mM): K gluconate, 125; Hepes, 10; BAPTA K<sub>4</sub>, 5; CaCl<sub>2</sub>, 2.38; Mg-ATP, 4; Na phosphocreatine, 10 and Na<sub>2</sub>-GTP, 0.3 (pH, 7.32–7.35). Data were acquired using an Axoclamp-2B and pClamp 9 (Axon Instruments, Foster City, CA). No correction was made for the calculated liquid junction potential of  $\approx$ 11 mV for our internal solution.

**Immunocytochemistry.** Transgenic GnRH-GFP mice ( $n = 5$ ) and vGluT2-GFP mice ( $n = 5$ ) were given an overdose of anesthetic and were perfused transcardially with physiological saline followed by 4% paraformaldehyde. Sections 20- $\mu$ m thick were cut on a cryostat in the coronal plane. After incubation in 1% normal goat serum, sections were incubated overnight in rabbit anti-MCH antibody (gift of Dr. W. Vale, Salk Institute), which is specific for MCH (12) at 1:3000. After washing, sections were incubated in a secondary antibody of goat anti-rabbit Ig conjugated to the red fluorophore, Alexa 594 at a dilution of 1:175 (Molecular Probes, Oregon). Sections were examined in an Olympus IX70 fluorescent microscope, and photomicrographs taken with a Spot camera (Diagnostic Imaging). Contrast and brightness were corrected in Adobe Photoshop; any correction was applied to the entire micrograph.

**Drugs and Drug Application.** MCH (Phoenix Pharmaceuticals, Burlingame, CA), kisspeptin (KiSS-1, metastin 45–54 amide, kisspeptin-10; KP-10, Sigma), and DHPG (Tocris Cookson) were diluted in ACSF from previously prepared stock solutions that were stored at  $-20^{\circ}$ C. Agonists were applied using a Y-tube (13). PMC-3881-PI, TTX (Alomone Labs, Jerusalem, Israel) and BaCl<sub>2</sub> were bath applied.

1. Suter KJ, et al. (2000) Genetic targeting of green fluorescent protein to gonadotropin-releasing hormone neurons: Characterization of whole-cell electrophysiological properties and morphology. *Endocrinology* 141:412–419.
2. Huang H, Ghosh P, van den Pol AN (2006) Prefrontal cortex-projecting glutamatergic thalamic paraventricular nucleus-excited by hypocretin: A feedforward circuit that may enhance cognitive arousal. *J Neurophysiol* 95:1656–1668.
3. Fu LY, van den Pol AN (2008) Agouti-related peptide and MC3/4 receptor agonists both inhibit excitatory hypothalamic ventromedial nucleus neurons. *J Neurosci* 28:5433–5449.
4. Dumalska I, et al. (2008) Excitatory effects of the puberty-initiating peptide kisspeptin and group I metabotropic glutamate receptor agonists differentiate two distinct subpopulations of gonadotropin-releasing hormone neurons. *J Neurosci* 28:8003–8013.
5. Wu M, Dumalska I, Morozova E, van den Pol AN, Alreja M (2009) Gonadotropin inhibitory hormone inhibits basal forebrain vGluT2-gonadotropin-releasing hormone neurons via a direct postsynaptic mechanism. *J Physiol* 587:1401–1411.
6. Tamamaki N et al. (2003) Green fluorescent protein expression and colocalization with calretinin, parvalbumin, and somatostatin in the GAD67-GFP knock-in mouse. *J Comp Neurol* 467:60–79.
7. Acuna-Goycolea C, Tamamaki N, Yanagawa Y, Obata K, van den Pol AN (2005) Mechanisms of neuropeptide Y, peptide YY, and pancreatic polypeptide inhibition of identified green fluorescent protein-expressing GABA neurons in the hypothalamic neuroendocrine arcuate nucleus. *J Neurosci* 25:7406–7419.
8. Wu M, Shanabrough M, Leranath C, Alreja M (2000) Cholinergic excitation of septohippocampal GABA but not cholinergic neurons: Implications for learning and memory. *J Neurosci* 20:3900–3908.
9. Xu C, Datta S, Wu M, Alreja M (2004) Hippocampal theta rhythm is reduced by suppression of the H-current in septohippocampal GABAergic neurons. *Eur J Neurosci* 19:2299–2309.
10. Wu M, Zaborszky L, Hajszan T, van den Pol AN, Alreja M (2004) Hypocretin/orexin innervation and excitation of identified septohippocampal cholinergic neurons. *J Neurosci* 24:3527–3536.
11. Xu C et al. (2004) Histamine innervation and activation of septohippocampal GABAergic neurons: Involvement of local ACh release. *J Physiol* 561:657–670.
12. Bittencourt JC et al. (1992) The melanin-concentrating hormone system of the rat brain: An immuno- and hybridization histochemical characterization. *J Comp Neurol* 319:218–245.
13. Wu M, Hajszan T, Leranath C, Alreja M (2003) Nicotine recruits a local glutamatergic circuit to excite septohippocampal GABAergic neurons. *Eur J Neurosci* 18:1155–1168.
